# Supplementary material for: High-Resolution Mapping of Expression-QTLs Yields Insight into Human Gene Regulation
Source: PubMed Central journal article supplement (PMC2556086; doi:10.1371/journal.pgen.1000214), 2008-10-10
Supplement: pgen.1000214.s020.pdf [file pgen.1000214.s020.pdf]

| Category    | Name            | TSS Model |              |          |                       | TSS+TES Model |              |          |                       |      |       |
|-------------|-----------------|-----------|--------------|----------|-----------------------|---------------|--------------|----------|-----------------------|------|-------|
|             |                 | Exp. nber | Fraction (%) | Estimate | Odds Ratio<br>CI(95%) | Exp. nber     | Fraction (%) | Estimate | Odds Ratio<br>CI(95%) |      |       |
| Exon        | Coding Syn.     | 36        | 4.22         | 1.78     | 0.81                  | 3.18          | 46           | 4.72     | 1.94                  | 1.00 | 3.18  |
|             | Coding Non-Syn. | 46        | 5.37         | 2.38     | 1.20                  | 4.01          | 55           | 5.66     | 2.41                  | 1.34 | 3.80  |
|             | Non-Coding      | 11        | 1.33         | 3.52     | 0.66                  | 10.25         | 13           | 1.31     | 3.90                  | 0.78 | 10.97 |
|             | First           | 32        | 3.70         | 2.32     | 1.09                  | 4.21          | 33           | 3.37     | 2.97                  | 1.45 | 5.21  |
|             | Last            | 135       | 15.81        | 8.92     | 6.04                  | 12.66         | 170          | 17.56    | 4.57                  | 3.33 | 6.06  |
| Intron      | Internal        | 460       | 53.75        | 1.00     | -                     | -             | 517          | 53.30    | 1.00                  | -    | -     |
|             | External        | 7         | 0.84         | 0.62     | 0.00                  | 2.53          | 1            | 0.15     | 0.13                  | 0.00 | 1.92  |
|             | First           | 120       | 14.03        | 1.39     | 0.91                  | 2.07          | 124          | 12.84    | 2.00                  | 1.36 | 2.88  |
|             | Last            | 8         | 0.97         | 3.99     | 0.64                  | 12.63         | 11           | 1.10     | 3.04                  | 0.85 | 7.77  |
| Entire Gene | 858             | 100.00    | 3.56         | 2.98     | 4.42                  | 969           | 100.00       | 1.68     | 1.44                  | 2.08 |       |

Table S 1: **Table of descriptive statistics for each of the 9 mutually exclusive gene structure annotations for the 11,446 genes of our data set.** The “Exp nber” and “Fraction” columns of the table are based on the posterior probabilities to be a genuine eQTN from the hierarchical model: left side for TSS-only+annotation model and right side for TSS+TES+annotation model.
