# Supplementary material for: High-Resolution Mapping of Expression-QTLs Yields Insight into Human Gene Regulation
Source: PubMed Central journal article supplement (PMC2556086; doi:10.1371/journal.pgen.1000214), 2008-10-10
Supplement: pgen.1000214.s021.pdf [file pgen.1000214.s021.pdf]

| Category | Name       | Freq.<br>(%) | Avg.<br>size<br>(kb) | Fraction<br>of gene<br>(%) | SNP<br>density<br>(kb <sup>-1</sup> ) | Fraction<br>of SNPs<br>(%) | Nber<br>of eQTLs | Fraction<br>of eQTLs<br>(%) |
|----------|------------|--------------|----------------------|----------------------------|---------------------------------------|----------------------------|------------------|-----------------------------|
| Exon     | Coding     | 100.00       | 1.7                  | 3.43                       | 0.98                                  | 2.99                       | 29               | 9.32                        |
|          | Non-Coding | 41.32        | 0.2                  | 0.18                       | 0.97                                  | 0.15                       | 2                | 0.56                        |
|          | First      | 93.12        | 0.2                  | 0.31                       | 0.84                                  | 0.23                       | 7                | 2.32                        |
|          | Last       | 94.47        | 1.1                  | 2.11                       | 1.23                                  | 2.29                       | 33               | 10.76                       |
| Intron   | Internal   | 91.11        | 44.5                 | 82.69                      | 1.15                                  | 83.76                      | 198              | 64.15                       |
|          | External   | 8.83         | 16.0                 | 2.87                       | 1.00                                  | 2.53                       | 3                | 1.02                        |
|          | First      | 34.98        | 11.3                 | 8.07                       | 1.05                                  | 7.47                       | 33               | 10.62                       |
|          | Last       | 4.67         | 3.4                  | 0.33                       | 2.05                                  | 0.60                       | 4                | 1.25                        |

**Table S 2: Table of descriptive statistics for each of the 8 mutually exclusive gene structure annotations for the 11,446 genes of our data set.**
